# Supplementary material
Source: publisher figshare collection journal article supplement (https://gsapubs.figshare.com/ndownloader/files/23392835)
Supplement: Supplementary file 1 [file 23392835]

## Sheet: All_Areas_summary.csv
# dataset: GeoCSV 2.0
# conventions_documentation: http://geows.ds.iris.edu/documents/GeoCSV.pdf
# title: Summary wind speed and gusts durrations over a five year period for each ASOS station in China	Oklahoma	Texas	and Wyoming.
# number_of_stations: 404
# creation_date: 2018-04-29T20:40:42.769964 UTC
# number_of_observations: 34558485
# number_of_valid_speed_observations: 33878946
# number_of_valid_gust_observations: 5175254
# time_coverage_start: 2012-01-01T00:00:00UTC
# time_coverage_end: 2016-12-31T23:58:00UTC
# delimiter:
# field_type: string	float	float	string	float	float	float	float	float	float	float	float	float	float
# field_unit: UTF-8	degrees_north	degrees_east	URF-8	minutes	minutes	minutes	minutes	minutes	minutes	minutes	minutes	minutes	minutes
# field_long_name: station_name	latitude_of_station	longitude_of_station	location	accumulated_time_in_bin01_speed	accumulated_time_in_bin02_speed	accumulated_time_in_bin03_speed	accumulated_time_in_bin04_speed	accumulated_time_in_bin05_speed	accumulated_time_in_bin01_gust	accumulated_time_in_bin02_gust	accumulated_time_in_bin03_gust	accumulated_time_in_bin04_gust	accumulated_time_in_bin05_gust
# bin01: [0 m/s - 15 m/s)
# bin02: [15 m/s - 20 m/s)
# bin03: [20 m/s - 25 m/s)
# bin04: [25 m/s - 30 m/s)
# bin05: [30 m/s - 64.3 m/s)
station_id	latitude	longitude	location	speed_bin01	speed_bin02	speed_bin03	speed_bin04	speed_bin05	gust_bin01	gust_bin02	gust_bin03	gust_bin04	gust_bin05
0F2	33.6017	-97.7756	Texas	2508295	155	0	0	0	591760	10200	295	40	0
11R	30.2189	-96.3742	Texas	2589955	60	0	0	0	382775	3675	200	0	20
1F0	34.147	-97.1226	Oklahoma	2583753	0	0	0	0	412805	1480	20	20	0
3T5	29.91	-96.95	Texas	2605870	20	0	0	0	352330	2040	40	0	0
46U	43.1846	-111.042	Wyoming	353060	0	0	0	0	60420	480	20	0	0
4O4	33.9094	-94.8594	Oklahoma	2542635	20	0	0	0	272687	2783	60	20	0
5C1	29.7239	-98.6946	Texas	2582365	0	0	0	0	501695	3600	80	0	0
5T9	28.8571	-100.513	Texas	568985	60	20	20	60	135280	2400	440	0	0
66R	29.6411	-96.5158	Texas	1152540	0	0	0	0	152685	835	40	0	0
6P9	32.4317	-98.5948	Texas	8589	0	0	0	0	1710	60	0	0	0
6R3	30.3564	-95.008	Texas	2486790	20	0	0	0	213442	795	20	0	0
6R6	30.046	-102.213	Texas	852958	212	26	25	6	157845	8820	841	65	51
82V	41.1533	-104.13	Wyoming	1713110	7700	440	0	0	391555	52445	8460	540	20
ABI	32.4113	-99.6819	Texas	1156412	416	27	0	0	177238	15781	1086	152	57
ACT	31.618	-97.2283	Texas	1188456	132	5	0	0	103687	6509	447	71	33
ADH	34.8043	-96.6712	Oklahoma	2407440	20	0	0	0	492970	6215	100	0	0
ADM	34.3032	-97.0195	Oklahoma	1400064	480	40	100	194	173533	5210	840	67	0
ADS	32.9686	-96.8364	Texas	1362950	675	200	48	120	397939	8977	1329	347	408
AFO	42.7112	-110.942	Wyoming	1604906	0	0	0	0	100529	1540	120	0	0
AFW	32.9733	-97.3181	Texas	1176610	75	0	0	0	205542	5508	267	8	20
AJL	43.674	-110.031	Wyoming	347751	1100	0	0	0	187481	30725	3819	480	40
ALI	27.7409	-98.0269	Texas	1217903	208	40	17	102	181979	7376	603	85	180
AMA	35.2194	-101.706	Texas	1171081	5357	221	12	0	159289	35390	7392	577	47
APY	26.9688	-99.2489	Texas	2416865	20	0	0	0	673995	3800	275	20	20
AQO	30.7836	-98.6619	Texas	2562895	240	0	0	0	316745	2480	570	170	0
AQR	34.4	-96.15	Oklahoma	1780735	0	0	0	0	274085	1420	20	0	0
ARM	29.2543	-96.1544	Texas	2572330	120	0	0	0	375910	8485	120	0	0
ASL	32.5205	-94.3078	Texas	2562612	0	0	0	0	235850	1100	20	20	0
ATT	30.3208	-97.7601	Texas	1034156	0	0	0	0	164253	765	0	11	0
AUS	30.1945	-97.6699	Texas	1184940	39	13	0	0	117222	4670	177	34	20
AVK	36.7732	-98.67	Oklahoma	2400185	4690	0	0	0	577485	70335	6525	180	20
AXH	29.5061	-95.4769	Texas	2469675	0	0	0	0	336725	1615	40	0	0
AXS	34.6988	-99.3385	Oklahoma	2553814	4847	180	0	0	503967	39609	4566	140	20
BAZ	29.709	-98.045	Texas	1246287	171	0	0	0	106563	5686	361	0	0
BBD	31.1793	-99.3239	Texas	2002740	100	0	20	0	8685	1690	320	60	100
BBF	27.833	-96.014	Texas	2097935	51205	4410	0	40	203575	61115	19375	1165	40
BEA	28.3619	-97.791	Texas	2543585	200	0	0	0	591110	8530	340	0	0
BGD	35.7009	-101.394	Texas	1162569	921	11	3	0	295909	24501	3080	50	23
BIF	31.8495	-106.38	Texas	813546	978	12	0	20	132649	12377	2582	95	20
BKD	32.719	-98.891	Texas	2454636	495	0	0	0	733301	14860	998	20	20
BKN	36.7451	-97.3496	Oklahoma	1924540	2960	40	0	0	438120	39000	3600	200	0
BKS	27.2067	-98.1211	Texas	2543385	20	0	0	0	548260	3880	75	0	0
BMQ	30.7389	-98.2386	Texas	1246009	18	12	0	0	211915	2494	269	26	0
BMT	30.0702	-94.2151	Texas	2386475	0	0	0	0	327990	3060	80	0	0
BPC	35.8893	-101.03	Texas	2453495	4100	60	0	0	690020	69400	6280	180	0
BPG	32.2126	-101.522	Texas	2583487	1680	20	0	0	569110	24855	1980	20	0
BPI	42.5851	-110.111	Wyoming	1155422	620	31	0	0	81323	9317	1342	168	20
BPT	29.95	-94.02	Texas	1242530	57	0	0	0	112659	5067	234	0	20
BQX	28.4936	-95.7244	Texas	1531190	20575	1355	0	0	353870	36040	9015	375	0
BRO	25.9146	-97.4231	Texas	1268407	283	0	0	0	196836	15135	407	0	0
BVO	36.7625	-96.0112	Oklahoma	1185711	3	0	0	0	164671	3664	166	0	7
BWD	31.7936	-98.9565	Texas	2538360	220	0	0	0	578800	11200	600	20	0
BYG	44.38	-106.72	Wyoming	1169723	9948	309	0	0	148193	67405	14986	1380	82
BYY	28.9733	-95.8634	Texas	2606080	20	0	0	0	390323	3160	20	40	0
CDS	34.4339	-100.288	Texas	1152619	2650	115	0	0	142249	20688	3631	245	20
CFD	30.7157	-96.3314	Texas	1842855	20	0	0	0	326125	1735	60	0	0
CHK	35.0974	-97.9677	Oklahoma	2462660	1220	0	0	0	525465	22330	1600	20	0
CLK	35.5383	-98.9327	Oklahoma	2290265	2120	20	0	0	520500	37470	2300	180	20
CLL	30.5881	-96.3639	Texas	1234358	85	0	0	0	108792	3779	204	27	29
CNW	31.6378	-97.0741	Texas	357844	160	0	0	300	62670	2320	134	20	20
COD	44.5202	-109.024	Wyoming	2463359	444	40	0	0	538970	42113	3522	100	40
COM	31.8411	-99.4036	Texas	2571790	620	0	0	0	561745	13805	640	40	0
COT	28.4567	-99.2183	Texas	1206307	136	0	0	0	146776	2952	432	30	100
CPR	42.908	-106.464	Wyoming	1168680	6650	322	0	0	154635	43729	7787	613	68
CPT	32.3537	-97.4338	Texas	2475785	240	0	0	0	440435	9980	280	0	100
CQB	35.7238	-96.8203	Oklahoma	2502195	100	0	0	0	520935	10160	440	0	0
CRH	28.9086	-93.3016	Texas	1218245	7680	115	0	20	167065	23555	3365	180	0
CRP	27.7731	-97.5128	Texas	1215715	1332	92	0	0	137532	19134	1201	52	19
CRS	32.03	-96.4	Texas	1193764	184	20	0	0	121715	4815	390	20	0
CSM	35.3398	-99.2005	Oklahoma	1179075	3973	26	8	0	149971	41389	4329	118	34
CUH	35.9499	-96.7731	Oklahoma	2563265	60	20	0	0	528060	10240	460	20	0
CVB	29.3419	-98.8509	Texas	2585225	340	20	0	0	409795	3240	560	20	20
CWC	33.8578	-98.4904	Texas	2580823	475	0	0	0	711049	22320	1520	140	100
CXO	30.3524	-95.4145	Texas	1250997	18	1	0	0	96353	2081	93	52	0
CYS	41.1556	-104.811	Wyoming	1201943	6354	326	0	0	232212	53227	11953	1376	86
CZT	28.5222	-99.8236	Texas	1524831	0	0	0	0	263371	1500	40	0	0
DAL	32.8471	-96.8518	Texas	1172504	42	3	0	0	162477	6508	458	35	16
DFW	32.8968	-97.038	Texas	1164705	463	8	0	0	121670	13142	674	75	0
DGW	42.7972	-105.386	Wyoming	1091526	4061	101	27	0	137519	30881	5520	395	62
DHT	36.0226	-102.547	Texas	1161724	8279	569	0	0	124814	34679	8958	879	52
DKR	31.307	-95.4038	Texas	2350230	15	0	0	0	232885	900	75	0	0
DLF	29.3595	-100.778	Texas	1082810	601	96	0	0	103483	6284	814	167	43
DRT	29.3742	-100.927	Texas	1187619	247	0	0	0	160250	3962	607	52	0
DTO	33.2061	-97.1989	Texas	1169787	200	7	2	0	126654	8657	543	66	237
DUA	33.9423	-96.3945	Oklahoma	2590495	260	0	0	0	417765	8695	655	0	40
DUB	43.5484	-109.69	Wyoming	1795272	8576	380	0	0	620170	92487	12059	791	20
DUC	34.47	-97.96	Oklahoma	2560760	220	0	0	0	500620	14055	680	60	0
DUX	35.858	-102.013	Texas	2578240	13600	700	0	0	578820	69405	13100	940	40
DWH	30.068	-95.5562	Texas	1244856	0	0	0	0	136007	1134	41	10	0
DWX	41.0374	-107.493	Wyoming	1744094	640	20	0	0	318690	18158	1160	40	0
DYS	32.421	-99.855	Texas	1006707	1213	14	0	0	173760	20017	1552	102	114
DZB	30.5271	-98.3588	Texas	2537272	0	0	0	0	464875	2000	80	0	0
E11	32.3311	-102.529	Texas	2380735	880	0	0	0	665080	14495	1440	20	0
E38	30.384	-103.684	Texas	2573173	1460	40	0	0	486953	23980	2300	180	0
EAN	42.0555	-104.929	Wyoming	3840	0	0	0	0	1140	80	0	0	0
EBG	26.4417	-98.1222	Texas	2506841	120	0	0	0	563980	6840	140	0	0
ECS	43.8854	-104.318	Wyoming	1740748	2632	20	0	0	360307	32453	3472	160	0
ECU	29.9469	-100.174	Texas	2486935	360	0	0	0	622165	3640	540	0	0
EDC	30.3925	-97.5621	Texas	2572440	80	0	0	0	433600	7260	240	20	0
EFD	29.6073	-95.1587	Texas	829936	75	40	20	40	34589	990	70	20	0
EHY	41.7253	-106.459	Wyoming	930931	31461	1689	0	40	302700	113664	33973	3169	40
ELA	29.6006	-96.3219	Texas	927840	60	0	0	0	145235	1980	220	0	0
ELK	35.4308	-99.3943	Oklahoma	1103440	1320	0	0	0	280635	15645	1540	20	0
ELP	31.8111	-106.376	Texas	1097152	2570	54	0	0	117943	17579	3909	295	0
EMK	27.8186	-94.3228	Texas	1762570	36275	2060	80	0	86635	35675	11670	460	60
EMM	41.8241	-110.557	Wyoming	1133774	2765	40	0	0	271117	32360	2850	40	0
END	36.3392	-97.9165	Oklahoma	994438	2062	58	0	0	152899	30532	2380	213	10
ERV	29.9767	-99.0855	Texas	2579660	100	0	0	0	429515	4260	460	0	0
EVW	41.2731	-111.031	Wyoming	1209791	1414	21	0	0	122425	21942	2159	76	1
F00	33.6131	-96.1793	Texas	66510	0	0	0	0	13950	260	0	0	0
F05	34.2257	-99.2837	Texas	2544553	1650	20	0	0	491476	22720	1760	40	20
F17	31.8316	-94.1564	Texas	908671	0	0	0	0	101294	640	20	0	0
F44	32.1638	-95.8284	Texas	2248300	20	0	0	0	303240	920	40	0	0
F46	32.9306	-96.4355	Texas	2231590	100	0	0	0	634675	11585	180	20	0
FBR	41.3941	-110.406	Wyoming	1660988	2790	0	0	0	408100	51406	4205	55	0
FDR	34.3521	-98.9839	Oklahoma	1150109	2320	106	0	0	115690	19791	2289	211	37
FEW	41.1333	-104.867	Wyoming	909286	9467	988	20	20	271958	47507	12711	1493	396
FSI	34.6449	-98.4033	Oklahoma	1021385	1927	48	0	0	167314	17245	3026	72	0
FST	30.9119	-102.917	Texas	1129512	364	40	52	0	172118	13192	939	51	66
FTN	28.2086	-100.019	Texas	1991785	20	0	0	0	595580	7080	440	0	0
FTW	32.8198	-97.3624	Texas	1172123	110	9	8	0	161410	8198	505	36	20
FWS	32.573	-97.3033	Texas	1644046	300	75	80	60	272802	9184	592	35	100
FWZ	42.5134	-108.777	Wyoming	1952325	8380	100	0	0	572135	59060	11820	280	0
GAG	36.2955	-99.7764	Oklahoma	1153051	2557	39	0	0	189625	45527	4214	184	35
GCC	44.3489	-105.539	Wyoming	1194747	2881	113	0	0	118642	26823	3343	436	91
GCM	36.29	-95.48	Oklahoma	2509510	120	0	0	0	520155	12455	280	20	0
GDJ	32.4444	-97.8169	Texas	2603260	60	0	0	0	488585	4820	180	40	0
GDP	31.8331	-104.81	Texas	762206	66301	12124	818	20	114319	71409	40628	9206	1500
GEY	44.5168	-108.083	Wyoming	1100554	2858	162	8	0	59726	17725	3158	229	61
GGG	32.384	-94.7115	Texas	1187510	74	13	0	41	91032	2220	247	27	29
GKY	32.6639	-97.0943	Texas	1179012	143	18	20	0	172565	7788	457	48	110
GLE	33.6514	-97.1969	Texas	2544880	100	0	0	0	466067	8480	220	0	0
GLS	29.2653	-94.8604	Texas	1247569	908	0	0	0	77750	12633	863	66	0
GMJ	36.6068	-94.7386	Oklahoma	2603100	120	0	0	0	398685	7640	180	0	0
GNC	32.6753	-102.653	Texas	2605094	1320	0	0	0	565795	17835	1740	60	20
GOK	35.8498	-97.4156	Oklahoma	1179489	72	0	0	0	220281	10982	504	57	20
GOP	31.4213	-97.797	Texas	2546290	40	0	0	0	401375	2615	200	0	0
GPM	32.6988	-97.0469	Texas	1508753	200	60	0	160	296709	4255	420	40	0
GRK	31.07	-97.83	Texas	1064146	464	0	37	40	150371	9696	675	18	0
GTU	30.6808	-97.6767	Texas	1618024	840	0	2	220	322601	5175	1250	300	40
GUL	27.3039	-93.5383	Texas	828738	3310	240	0	0	117018	15805	1845	200	0
GUR	42.2597	-104.728	Wyoming	1184450	1800	20	0	0	227545	24610	3340	100	20
GUY	36.6817	-101.505	Oklahoma	1146034	4763	114	0	0	161871	34055	6094	491	34
GVT	33.0678	-96.0653	Texas	2543664	55	215	145	354	395908	3765	110	0	0
GVX	28.5767	-94.9767	Texas	1536175	14020	965	0	0	141305	21695	4830	420	0
GYB	30.17	-96.98	Texas	2573575	40	0	0	0	424960	1780	80	0	0
GYI	33.7141	-96.6737	Texas	2519809	460	0	0	0	517135	15085	520	40	20
GZL	35.2891	-95.0939	Oklahoma	2360320	40	0	0	0	443200	8780	320	0	20
GZN	32.3658	-99.0237	Texas	255460	0	0	0	0	68060	1320	0	0	0
HBR	34.9913	-99.0514	Oklahoma	1167484	2715	115	0	0	145855	32047	3066	303	73
HBV	27.3496	-98.7369	Texas	2274467	180	0	0	0	574159	4160	260	0	0
HDO	29.3594	-99.1742	Texas	1209071	358	13	0	0	85527	4014	522	68	11
HHF	35.895	-100.404	Texas	2571290	1580	0	0	0	725335	49465	2580	140	0
HHV	26.9392	-94.6886	Texas	2012155	16235	885	20	0	603670	54470	6950	380	40
HHW	34.0348	-95.5419	Oklahoma	2324470	20	0	0	0	334825	2620	40	40	0
HLR	31.1387	-97.7145	Texas	988080	158	5	0	0	166500	4932	353	38	0
HOU	29.6375	-95.2824	Texas	1192156	44	20	0	0	121687	3801	128	52	0
HQI	27.962	-93.6708	Texas	2373610	22145	980	20	20	504020	67650	10085	315	40
HQZ	32.747	-96.5304	Texas	1972730	491	0	20	160	317780	5486	731	100	20
HRL	26.2285	-97.6544	Texas	1240221	1034	24	0	0	151748	16121	1241	12	0
HRX	34.8578	-102.326	Texas	2074905	9160	260	0	60	613710	56635	9260	520	60
HSG	43.7136	-108.39	Wyoming	351510	220	0	0	0	78805	4010	460	20	0
HYI	29.8927	-97.863	Texas	1815081	394	80	17	246	222258	6348	414	100	48
IAH	29.9844	-95.3414	Texas	1196584	58	0	0	0	101729	2930	188	9	0
IKG	27.5509	-98.0309	Texas	64515	0	0	0	0	8840	20	0	0	0
ILE	31.0858	-97.6865	Texas	2416221	41	0	0	0	470491	5386	249	0	40
INJ	32.0836	-97.0972	Texas	2579182	340	0	0	0	503567	16310	260	0	0
INK	31.78	-103.2	Texas	1113731	1060	4	0	34	134869	11699	1614	35	4
JAC	43.6128	-110.737	Wyoming	1697999	781	206	60	44	180163	9723	1585	364	224
JAS	30.8857	-94.0349	Texas	2580040	20	0	0	0	225235	840	40	0	0
JCT	30.5108	-99.7664	Texas	1194140	19	0	0	0	141905	2596	265	18	0
JDD	32.7422	-95.4965	Texas	2529255	0	0	0	0	241310	600	0	0	0
JPD	44.15	-107.17	Wyoming	118580	1380	80	0	0	20760	2720	1160	40	0
JSO	31.87	-95.22	Texas	2558417	0	0	0	0	331511	980	0	0	0
JSV	35.4381	-94.8028	Oklahoma	2501220	40	0	0	0	251150	3040	160	0	0
JWG	35.8647	-98.4207	Oklahoma	2156595	775	0	0	0	572175	27140	1400	0	20
JWY	32.4561	-96.9125	Texas	2533488	80	0	0	0	478088	8415	220	20	40
JXI	32.7	-94.95	Texas	2323882	0	0	0	0	265960	700	100	0	40
LAR	41.3121	-105.675	Wyoming	1168841	9459	640	20	0	146874	48754	9727	1075	100
LAW	34.5677	-98.4166	Oklahoma	1173836	2027	59	0	0	166663	16120	3016	310	0
LBB	33.6636	-101.823	Texas	1168127	4101	277	0	19	154860	27447	5537	483	45
LBR	33.5932	-95.0636	Texas	1383015	0	0	0	0	141710	260	20	0	0
LBX	29.1086	-95.4621	Texas	1252453	25	0	0	0	114941	4731	133	18	15
LFK	31.234	-94.75	Texas	1237153	9	0	0	0	85295	854	30	0	0
LHB	30.87	-96.62	Texas	2564565	40	0	0	0	360050	4520	280	140	340
LNC	32.5792	-96.719	Texas	2583933	120	0	0	0	442883	6420	220	60	0
LND	42.8152	-108.73	Wyoming	1159627	1945	212	0	0	59429	13073	3725	490	52
LRD	27.5438	-99.4615	Texas	1166896	162	21	0	0	88730	4024	275	53	0
LSK	42.7538	-104.405	Wyoming	263000	480	0	0	0	58620	3420	340	40	0
LTS	34.6671	-99.2667	Oklahoma	1072500	2129	47	1	0	153118	20961	2897	226	49
LUD	33.2542	-97.5805	Texas	2577642	80	0	0	0	610598	5280	260	0	0
LVJ	29.52	-95.24	Texas	1254816	0	0	0	0	132333	2738	95	42	0
LXY	31.6412	-96.5145	Texas	1692410	20	0	0	0	424005	4705	180	20	0
LZZ	31.1062	-98.1959	Texas	2465060	0	0	0	0	444940	1620	40	0	0
MAF	31.9425	-102.189	Texas	1152493	1540	60	0	0	123621	14792	1751	131	14
MCJ	29.7133	-95.3955	Texas	2371780	100	0	0	0	595560	12540	520	80	20
MDD	32.0365	-102.101	Texas	2551444	680	20	0	0	639220	13405	1175	120	0
MFE	26.1758	-98.2386	Texas	1235074	126	8	0	0	190177	8717	464	39	25
MIU	27.2917	-96.7367	Texas	312385	3915	160	0	0	20225	9555	755	40	0
MKN	31.92	-98.6	Texas	2580830	180	20	0	0	677505	14260	440	20	20
MKO	35.6567	-95.3614	Oklahoma	1194655	109	0	0	0	117694	7552	450	22	10
MLC	34.8822	-95.7831	Oklahoma	1209319	107	0	0	0	203433	4929	299	31	8
MNZ	31.6659	-98.1486	Texas	2411990	440	20	0	0	633250	16414	880	20	0
MRF	30.37	-104.02	Texas	2329507	953	1	0	0	352406	13295	412	106	0
MWL	32.7816	-98.0602	Texas	1190331	86	0	0	0	128493	5988	513	40	9
MZG	27.7269	-96.1911	Texas	2314655	37830	4305	100	40	776240	75675	20650	2380	120
NFW	32.781	-97.4365	Texas	945161	585	48	0	0	135562	10013	1265	240	26
NGP	27.6926	-97.2911	Texas	1026920	1485	55	10	0	156388	18114	1284	96	64
NMT	28.2361	-98.7242	Texas	25967	0	0	0	0	5487	340	0	0	0
NOG	27.9011	-98.0517	Texas	1004182	263	20	0	0	152180	7129	465	101	161
NQI	27.5072	-97.8097	Texas	1026396	362	3	0	0	181511	8918	565	20	24
OCH	31.5778	-94.7094	Texas	2555674	20	0	0	0	252530	1725	60	0	20
ODO	31.9206	-102.387	Texas	1116347	693	22	0	0	148018	11634	1333	38	16
OJA	35.5448	-98.6685	Oklahoma	2553432	780	20	0	0	743074	30215	1440	80	0
OKC	35.3889	-97.6006	Oklahoma	1178741	1345	62	0	0	159789	25044	2407	129	82
OKM	35.67	-95.95	Oklahoma	2481370	140	0	0	0	685300	20480	660	0	0
OPM	26.8328	-96.94	Texas	1210425	580	20	0	0	126195	5295	260	0	0
ORG	30.0692	-93.8036	Texas	2524380	0	0	0	0	316195	560	40	0	0
OSA	33.0956	-94.9614	Texas	2604308	0	20	0	0	288532	2980	140	20	0
OUN	35.2435	-97.4708	Oklahoma	2549023	580	140	0	0	603296	21361	1060	160	40
OWP	36.1753	-96.1518	Oklahoma	1720290	20	0	0	0	315330	2100	80	0	0
OZA	30.7353	-101.203	Texas	2361200	280	0	0	0	717345	14530	660	40	0
P60	44.5444	-110.421	Wyoming	857588	0	0	0	0	60804	304	0	0	0
PEQ	31.38	-103.51	Texas	2453733	2175	60	20	0	324532	21343	2101	120	20
PEZ	28.9542	-98.52	Texas	2515775	240	0	0	0	457185	2080	400	0	20
PIL	26.1597	-97.3378	Texas	1254944	282	0	0	0	186421	16204	700	23	20
PKV	28.654	-96.681	Texas	2420025	240	0	0	0	435659	11860	140	0	0
PNA	42.7955	-109.807	Wyoming	2535885	740	40	0	0	342490	19897	880	60	0
PNC	36.73	-97.1	Oklahoma	1144225	238	17	0	0	227498	11121	783	63	0
POY	44.8672	-108.793	Wyoming	1288240	5380	140	0	0	242670	39345	5535	260	0
PPA	35.613	-100.996	Texas	2552340	7840	80	20	0	713350	69835	9075	180	80
PRS	29.6342	-104.362	Texas	1580715	320	0	0	0	248310	4855	740	60	0
PRX	33.6366	-95.4507	Texas	2523655	260	20	0	0	365850	9595	495	30	0
PSN	31.7797	-95.7063	Texas	2551072	0	0	0	0	329205	1440	0	0	0
PSX	28.73	-96.25	Texas	1214973	447	0	0	34	113063	10021	645	116	428
PVJ	34.7108	-97.2231	Oklahoma	2454435	100	0	0	0	488915	9340	440	0	0
PVW	34.1681	-101.717	Texas	2601950	5360	200	0	0	563785	40835	6060	200	40
PWA	35.5342	-97.6471	Oklahoma	1191631	658	27	0	20	180035	30378	1820	155	110
PWG	31.4849	-97.3165	Texas	2295333	120	20	0	0	445631	9746	213	0	20
PYX	36.414	-100.75	Texas	2539520	12050	335	0	0	591400	75955	10630	300	60
RAS	27.81	-97.09	Texas	2572219	560	0	0	0	697889	14555	415	20	0
RBD	32.68	-96.87	Texas	1209120	37	2	0	0	216263	5492	368	2	0
RBO	27.7785	-97.6905	Texas	2181340	740	60	0	0	525195	16520	680	40	0
RCE	35.4881	-97.8236	Oklahoma	2465440	1900	160	20	0	798180	68080	4360	300	40
RFI	32.1417	-94.8517	Texas	2497171	0	0	0	0	271571	1020	75	0	0
RIW	43.0642	-108.46	Wyoming	1149860	2548	140	0	0	74982	21016	3500	284	20
RKP	28.0836	-97.0464	Texas	1246548	74	0	0	0	232861	5513	187	0	20
RKR	35.02	-94.62	Oklahoma	2501409	80	0	0	0	329677	5680	240	60	0
RKS	41.5942	-109.065	Wyoming	1156215	9260	470	0	0	131862	50278	8848	1131	130
RND	29.53	-98.28	Texas	1237096	94	0	0	0	84367	3237	334	7	0
RPH	33.11	-98.555	Texas	2473891	100	0	0	0	538806	8100	440	20	0
RQO	35.4727	-98.0058	Oklahoma	1656000	2840	100	0	0	351380	34320	2360	20	0
RVS	36.0396	-95.9846	Oklahoma	1176427	18	7	0	0	161546	3240	112	14	0
RWL	41.8056	-107.2	Wyoming	1173981	9427	498	0	0	230432	74350	13237	1379	146
RWV	30.5155	-96.7041	Texas	2387140	40	0	0	0	356890	2560	40	0	100
RYW	30.4967	-97.9659	Texas	2581345	60	0	0	0	666645	2815	340	40	0
SAA	41.4435	-106.828	Wyoming	1838286	5358	40	0	0	486726	55164	6648	239	0
SAT	29.5337	-98.4698	Texas	1199324	136	0	0	0	118090	3562	457	83	0
SEP	32.2153	-98.1777	Texas	2607955	120	0	0	0	538905	7400	240	40	0
SGR	29.6223	-95.6565	Texas	1085542	49	0	0	20	76871	2825	91	31	0
SHR	44.77	-106.97	Wyoming	1170486	3681	246	9	0	60409	18294	4500	423	146
SJT	31.3517	-100.495	Texas	1170734	353	59	7	0	158865	8052	826	98	17
SKF	29.3842	-98.5811	Texas	1269602	133	0	0	0	113896	3639	284	14	0
SLR	33.16	-95.62	Texas	2566841	200	20	0	0	399910	7855	460	20	0
SNK	32.6934	-100.951	Texas	2589742	1560	60	0	0	584332	22270	2080	160	0
SNL	35.3573	-96.9428	Oklahoma	2491134	120	20	0	0	423720	7240	240	20	0
SOA	30.5857	-100.649	Texas	2481535	20	0	0	0	472660	2800	40	0	20
SPL	26.0706	-97.1572	Texas	2283520	520	20	0	0	299900	16280	100	0	20
SPS	33.9786	-98.4928	Texas	1154641	1235	28	0	0	121978	17422	1836	97	23
SRE	35.2747	-96.6752	Oklahoma	207360	60	0	0	0	67820	1680	100	0	0
SSF	29.337	-98.4711	Texas	1247960	20	0	0	0	117367	1682	138	0	0
SWO	36.1612	-97.0857	Oklahoma	1169286	85	15	0	0	163739	11777	608	93	27
SWW	32.4674	-100.467	Texas	2581293	980	20	0	0	693050	26460	1140	60	20
T20	29.528	-97.4614	Texas	1891630	20	0	0	0	345730	3840	100	0	0
T35	30.8794	-96.9711	Texas	2441345	40	0	0	0	473215	5480	80	40	0
T65	26.1776	-97.9731	Texas	2550105	20	0	0	0	777265	11285	340	0	0
T70	29.126	-100.481	Texas	144740	5	0	0	0	9794	211	12	0	0
T77	29.6341	-104.362	Texas	75140	20	0	0	0	19820	520	100	0	0
T82	30.2432	-98.9092	Texas	2587550	80	0	0	0	455990	3940	420	0	0
TBX	43.4646	-108.238	Wyoming	2049265	58550	15620	3520	180	352105	77845	29320	11280	1860
TFP	27.913	-97.2115	Texas	2526285	340	0	0	0	799600	17900	780	40	60
TIK	35.4147	-97.3866	Oklahoma	1052891	756	36	6	5	173122	19322	1201	32	35
TKI	33.18	-96.59	Texas	1181213	92	3	0	0	118137	7225	322	21	20
TME	29.805	-95.8979	Texas	2528494	100	0	0	0	303540	5260	180	0	0
TOR	42.0647	-104.153	Wyoming	1159309	2374	116	0	0	138069	27865	5650	433	68
TPL	31.1525	-97.4078	Texas	2353879	368	0	0	0	436286	13611	266	20	20
TQH	35.93	-95	Oklahoma	2594520	20	0	0	0	423515	3940	120	20	0
TRL	32.71	-96.27	Texas	1206838	59	0	0	0	130709	3504	178	10	0
TUL	36.1984	-95.8881	Oklahoma	1159410	121	3	0	0	144844	13843	613	23	21
TYR	32.3541	-95.4024	Texas	1202796	23	0	0	0	104042	2456	177	32	0
U68	44.9117	-108.445	Wyoming	1254210	2815	100	0	0	150040	17070	3240	215	0
UTS	30.7469	-95.5872	Texas	1248903	18	0	0	0	122689	1392	103	0	0
UVA	29.2113	-99.7436	Texas	2559844	200	0	0	0	325315	3080	440	40	0
VAF	27.3536	-94.6253	Texas	2438295	9175	675	20	0	322875	37165	4860	280	20
VCT	28.8614	-96.9303	Texas	1253480	155	7	0	0	123087	8210	417	23	0
VKY	29.248	-88.441	Texas	2087415	15280	740	20	0	266390	41295	5615	340	20
W43	44.6629	-104.568	Wyoming	1428975	180	0	0	0	275230	6780	480	20	0
WDG	36.3792	-97.7911	Oklahoma	1479995	1975	60	60	240	243303	26041	1658	240	100
WRL	43.9657	-107.951	Wyoming	1151442	695	8	0	0	45072	7799	1263	80	12
WWR	36.438	-99.5227	Oklahoma	2480360	3660	20	0	0	738952	69354	4160	60	0
XBP	33.1753	-97.8284	Texas	2488968	40	0	0	0	502075	3260	140	0	0
ZBAA	40.0741	116.587	China	1746120	1160	20	0	0	37880	14900	1780	60	0
ZBCZ	36.2475	113.126	China	100	0	0	0	0	0	0	0	0	0
ZBDT	40.0603	113.482	China	20	0	0	0	0	0	0	0	0	0
ZBHD	36.526	114.425	China	40	0	0	0	0	0	0	0	0	0
ZBHH	40.8167	111.683	China	873267	80	0	0	0	16440	6380	360	0	0
ZBLA	49.205	119.825	China	60	0	0	0	0	0	0	0	0	0
ZBMZ	49.565	117.333	China	20	0	0	0	0	0	0	0	0	0
ZBOW	40.56	109.997	China	140	0	0	0	0	0	0	0	0	0
ZBSH	39.9681	119.731	China	180	0	0	0	0	0	0	0	0	0
ZBSJ	38.2807	114.697	China	876100	100	40	0	0	3640	1540	180	80	0
ZBTJ	39.1243	117.346	China	1746380	680	40	0	0	14900	8320	920	100	0
ZBUL	46.1953	122.008	China	80	0	0	0	0	0	0	0	0	0
ZBYC	35.1164	111.031	China	40	0	0	0	0	0	0	0	0	0
ZBYN	37.7833	112.55	China	1747140	160	0	0	0	21240	6540	260	20	0
ZGBH	21.4833	109.1	China	240	0	0	0	0	0	0	0	0	0
ZGCD	28.9189	111.64	China	60	0	0	0	0	0	0	0	0	0
ZGDY	29.13	110.48	China	660	0	0	0	0	0	0	0	0	0
ZGGG	23.3964	113.301	China	1750320	40	0	0	0	12020	1720	140	0	0
ZGHA	28.2333	112.867	China	873120	0	0	0	0	1900	240	20	0	0
ZGKL	25.3333	110.3	China	873300	20	0	0	0	1980	80	0	20	0
ZGMX	24.3	116.117	China	800	0	0	0	0	0	0	0	0	0
ZGNN	22.6333	108.217	China	873560	200	40	0	0	2960	860	240	100	0
ZGOW	23.4	116.683	China	873420	180	40	0	0	6580	480	240	80	40
ZGSD	22.0064	113.376	China	100	0	0	0	0	0	20	0	0	0
ZGSZ	22.55	114.1	China	873500	320	0	0	0	4920	1180	300	40	0
ZHCC	34.7167	113.65	China	873320	60	0	0	0	10900	2660	240	0	0
ZHHH	30.62	114.13	China	873500	0	0	0	0	5020	420	0	40	0
ZHLY	34.7411	112.388	China	220	0	0	0	0	0	0	0	0	0
ZHXF	32.1506	112.291	China	140	0	0	0	0	0	0	0	0	0
ZHYC	30.671	111.441	China	20	0	0	0	0	0	0	0	0	0
ZJHK	19.9349	110.459	China	872560	500	40	60	20	1940	1700	560	220	120
ZJSY	18.3029	109.412	China	874285	580	100	0	0	2820	1900	760	140	100
ZLAK	32.7081	108.931	China	0	0	0	0	0	0	0	0	0	0
ZLDH	40.1611	94.8092	China	20	0	0	0	0	0	0	0	0	0
ZLIC	38.4667	106.2	China	60	0	0	0	0	0	0	0	0	0
ZLLL	36.02	103.75	China	873400	20	0	0	0	7580	1900	140	0	0
ZLXY	34.4471	108.752	China	873580	60	0	0	0	5780	480	60	0	0
ZLYA	36.6	109.5	China	60	0	0	0	0	0	0	0	0	0
ZLYL	38.2692	109.731	China	60	0	0	0	0	0	0	0	0	0
ZMUB	47.8431	106.767	China	1651401	1240	20	0	0	24260	9220	1160	0	0
ZPJH	21.9739	100.76	China	140	0	0	0	0	0	0	0	0	0
ZPLJ	26.6783	100.247	China	340	0	0	0	0	0	0	0	0	0
ZPPP	25.0167	102.683	China	873200	520	0	0	0	13100	11560	760	20	0
ZSAM	24.4833	118.083	China	873120	100	40	0	0	6520	1120	280	20	40
ZSCG	31.9197	119.779	China	40	0	0	0	0	0	0	0	0	0
ZSCN	28.6	115.917	China	120	0	0	0	0	0	0	0	0	0
ZSFZ	26.0833	119.283	China	871960	980	360	20	0	7760	6100	1040	320	200
ZSGZ	25.8667	115	China	60	0	0	0	0	0	0	0	0	0
ZSHC	30.2333	120.167	China	1747280	60	0	0	0	11800	1560	280	0	0
ZSJJ	29.4769	115.801	China	80	0	0	0	0	0	0	0	0	0
ZSJN	36.8555	117.206	China	5184	0	0	0	0	516	66	20	0	0
ZSJU	28.9658	118.899	China	20	0	0	0	0	0	0	0	0	0
ZSLG	34.5717	118.874	China	40	0	0	0	0	0	0	0	0	0
ZSLQ	28.562	121.429	China	20	0	0	0	0	0	0	0	0	0
ZSNB	29.8267	121.462	China	873260	0	0	0	0	10260	1960	340	40	0
ZSNJ	31.7333	118.867	China	873506	60	0	0	0	4360	420	80	20	0
ZSNT	32.0167	120.85	China	140	0	0	0	0	0	0	0	0	0
ZSOF	31.78	117.298	China	872520	0	0	0	0	1940	440	0	0	0
ZSPD	31.1167	121.767	China	1745040	1800	0	0	0	30100	12700	2160	100	0
ZSQD	36.0667	120.333	China	873680	100	0	0	0	13000	4100	240	0	0
ZSQZ	24.7964	118.59	China	940	0	0	0	0	60	0	0	0	0
ZSSS	31.1979	121.336	China	1747280	120	0	0	0	50740	7480	500	40	0
ZSTX	29.7333	118.256	China	460	0	0	0	0	0	0	0	0	0
ZSWF	36.6467	119.119	China	60	0	0	0	0	0	0	0	0	0
ZSWH	37.1871	122.229	China	20	0	0	0	0	0	0	0	0	0
ZSWX	31.4944	120.429	China	80	0	0	0	0	0	0	0	0	0
ZSWY	27.7019	118.001	China	1500	0	0	0	0	0	0	0	0	0
ZSWZ	27.9122	120.852	China	200	0	0	0	0	0	0	0	0	0
ZSXZ	34.0583	117.555	China	60	0	0	0	0	0	0	0	0	0
ZSYN	33.425	120.202	China	240	0	0	0	0	0	0	0	0	0
ZSYT	37.4017	121.372	China	100	0	0	0	0	0	0	0	0	0
ZSYW	29.3447	120.032	China	20	0	0	0	0	0	0	0	0	0
ZSZS	29.9342	122.362	China	380	0	0	0	0	80	40	0	0	0
ZUBD	30.5536	97.1083	China	60	0	0	0	0	0	0	0	0	0
ZUCK	29.52	106.48	China	873412	0	0	0	0	480	40	0	0	0
ZUGH	30.948	104.329	China	80	0	0	0	0	0	0	0	0	0
ZUGY	26.5833	106.733	China	643220	20	0	0	0	5460	940	60	0	0
ZUKD	30.15	101.73	China	120	0	0	0	0	0	0	0	0	0
ZULS	29.2944	90.9	China	420	0	0	0	0	20	0	0	0	0
ZULZ	28.8522	105.393	China	180	0	0	0	0	0	0	0	0	0
ZUMY	31.4281	104.741	China	60	0	0	0	0	0	0	0	0	0
ZUUU	30.6667	104.017	China	873569	0	0	0	0	1680	140	20	0	0
ZUYB	28.8006	104.545	China	20	0	0	0	0	0	0	0	0	0
ZWAK	41.2625	80.2917	China	60	0	0	0	0	0	0	0	0	0
ZWKL	41.6978	86.1289	China	60	0	0	0	0	0	0	0	0	0
ZWKM	45.4665	84.9527	China	20	0	0	0	0	20	0	0	0	0
ZWSH	39.4667	75.9833	China	950050	1080	20	0	20	8860	6600	1120	160	20
ZWTC	46.6725	83.3408	China	20	0	0	0	0	0	0	0	0	0
ZWTN	37.1333	79.9333	China	480	0	0	0	0	0	0	0	0	0
ZWWW	43.9071	87.4742	China	1746270	720	0	0	0	9920	3600	1000	140	0
ZWYN	43.9558	81.3303	China	120	0	0	0	0	20	0	0	0	0
ZYAS	41.1053	122.854	China	60	0	0	0	0	0	0	0	0	0
ZYCC	43.9	125.217	China	872740	260	0	0	0	19180	5960	620	0	0
ZYCY	41.5381	120.435	China	100	0	0	0	0	0	0	0	0	0
ZYHB	46.02	126.58	China	873000	500	20	0	0	17280	8220	620	20	0
ZYHE	50.1716	127.309	China	100	0	0	0	0	0	0	0	0	0
ZYJM	46.8434	130.465	China	200	0	0	0	20	0	0	0	0	0
ZYJZ	41.1014	121.062	China	80	0	0	0	0	0	0	0	0	0
ZYMD	44.5241	129.569	China	20	0	0	0	0	0	0	0	0	0
ZYQQ	47.3833	123.917	China	160	0	0	0	0	0	0	0	0	0
ZYTL	38.9	121.633	China	1746650	340	0	0	0	59508	18000	1260	120	0
ZYTX	41.8	123.4	China	1747100	80	0	0	0	21080	5940	320	0	0
ZYYJ	42.8828	129.451	China	20	0	0	0	0	0	0	0	0	0

## Sheet: G47282
Adams, S.M., and Soreghan, G.S., 2020, A test of the efficacy of sand saltation for silt production: Implications for the interpretation of loess: Geology, v. 48, https://doi.org/10.1130/G47282.1
